# Supplementary material
Source: PubMed Central journal article supplement (PMC3856316)
Supplement: NIHMS526213-supplement-01.pdf [file NIHMS526213-supplement-01.pdf]

**Supplemental Material****Supplemental Tables**

| <b>Table</b> | <b>Title</b>                                                               | <b>page</b> |
|--------------|----------------------------------------------------------------------------|-------------|
| S1           | Conceptual model: kinetic rate constants for conceptual model in Figure 1  | 2           |
| S2           | Virtual screen: kinetic rate constants for modules                         | 3           |
| S3           | Virtual screen: parameter values for input functions                       | 4           |
| S4           | Principles governing dynamic specificity                                   | 5           |
| S5           | NF $\kappa$ B Model: reactions, species, and parameter values              | 6           |
| S6           | NF $\kappa$ B Model: IKK input functions                                   | 7           |
| S7           | NF $\kappa$ B Model: Biochemical and pharmacologic groupings of parameters | 8           |

**Supplemental Figures**

| <b>Figure</b> | <b>Title</b>                                       | <b>page</b> |
|---------------|----------------------------------------------------|-------------|
| S1            | Dose responses for the virtual screen              | 9           |
| S2            | Early-Late classification for the virtual screen   | 10          |
| S3            | Detailed Analysis of modules M3 and M4             | 11          |
| S4            | NF $\kappa$ B Model: effect of perturbations       | 13          |
| S5            | NF $\kappa$ B Model: Wiring diagram and parameters | 14          |

| Feedback hub     |         | TF2 |        |
|------------------|---------|-----|--------|
| k1               | 0.125   | k5a | 0.014  |
| k2a              | 0.0066  | k5b | 0.0006 |
| k2b              | 0.75    | TF1 |        |
| k3               | 0.07    | k6  | 0.5    |
| k4               | 0.025   | k7a | 0.01   |
| km1              | 0.075   | k7b | 20     |
| km2b             | 0.015   | k8  | 0.1    |
| km3              | 0.0025  | k9  | 0.001  |
| km4              | 0.0025  | km8 | 0.05   |
| Perturbation A   |         | km9 | 0.05   |
| k1               | 0.01    |     |        |
| Perturbation FBR |         |     |        |
| k4               | 0.00004 |     |        |

**Supplemental Table S1: Rate constants used to simulate the simple network model (See Figure 1).** The names of the rate constants correspond to equations 1-5 in Methods.

|                 |       |       |    |           |       |    |
|-----------------|-------|-------|----|-----------|-------|----|
| <b>M1</b>       |       |       |    | <b>M5</b> |       |    |
| k1              | 0.085 |       | R2 | k1        | 0.075 | R6 |
| k2              | 0.085 |       | R2 | k2a       | 0.025 | R6 |
| km1             | 0.1   |       | N  | k2i       | 5.0   | R8 |
| km2             | 0.1   |       | N  | k3        | 0.025 | R8 |
| <b>M2</b>       |       |       |    | k4        | 0.01  | R5 |
| k1              | 0.1   |       | R2 | km1       | 0.1   | N  |
| k2a             | 0.05  |       | R2 | km2       | 0.1   | N  |
| k3              | 0.04  |       | R2 | km3       | 0.1   | N  |
| km1             | 0.1   |       | N  | km4       | 0.1   | N  |
| km2             | 0.1   |       | N  | <b>M6</b> |       |    |
| km3             | 0.1   |       | N  | k1        | 0.075 | R5 |
| <b>M3 - M3'</b> |       |       |    | k2a       | 0.025 | R5 |
| k1              | 0.075 | 0.125 | R5 | k2i       | 2.5   | R5 |
| k2a             | 0.025 | 0.01  | R5 | k3        | 0.025 | R5 |
| k2b             | 0.075 | 0.25  | R7 | k4        | 0.01  | R2 |
| k3              | 0.025 | 0.02  | R5 | km1       | 0.1   | N  |
| k4              | 0.01  | 0.01  | R4 | km2       | 0.1   | N  |
| km1             | 0.1   | 0.1   | N  | km3       | 0.1   | N  |
| km2             | 0.1   | 0.1   | N  | km4       | 0.1   | N  |
| km3             | 0.1   | 0.025 | N  | <b>M7</b> |       |    |
| km4             | 0.1   | 0.025 | N  | k1        | 0.075 | R6 |
| <b>M4 - M4'</b> |       |       |    | k2a       | 0.01  | R6 |
| k1              | 0.075 | 0.25  | R3 | k2i       | 0.25  | R6 |
| k2a             | 0.025 | 0.05  | R5 | k3        | 0.25  | R6 |
| k2b             | 0.075 | 1.0   | R4 | k4        | 0.25  | R6 |
| k3              | 0.025 | 0.04  | R3 | km1       | 0.1   | N  |
| k4              | 0.01  | 0.04  | R2 | km2       | 0.1   | N  |
| km1             | 0.1   | 0.05  | N  | km3       | 0.1   | N  |
| km2             | 0.1   | 0.05  | N  | km4       | 0.1   | N  |
| km3             | 0.1   | 0.05  | N  | km2i      | 0.1   | N  |
| km4             | 0.1   | 0.05  | N  |           |       |    |

**Supplemental Table S2: Rate constants for modules M1-7 used in the virtual screen (relate to Figure 2).** The parameter names correspond to equations 10-25 in Methods. Multiplier range used to simulate perturbations are indicated next to each parameter ( $R_n = 2^{-n}$  to  $2^n$  in  $n/20$  increments). Parameters indicated as N were not varied. Models M3' and M4' were used to generate Figure 4.

| <b>S</b> | <b>Function</b> | <b>sl</b> | <b>sb</b> | <b>sh</b> | <b>tr</b> | <b>td</b> | <b>tp1</b> | <b>tc</b> | <b>j</b> | <b>h</b> |
|----------|-----------------|-----------|-----------|-----------|-----------|-----------|------------|-----------|----------|----------|
| 1        | F1              | 0         | 0.005     | 1         | 0.5       | 0         | 10         | 0.5       | NA       | NA       |
| 2        | F1              | 0         | 0.005     | 1         | 0.5       | 0         | 60         | 0.5       | NA       | NA       |
| 3        | F1              | 0         | 0.005     | 1         | 0.5       | 0         | 180        | 5         | NA       | NA       |
| 4        | F1              | 0         | 0.005     | 1         | 2.5       | 0         | 15         | 2.5       | NA       | NA       |
| 5        | F1              | 0         | 0.005     | 1         | 10        | 0         | 15         | 300       | NA       | NA       |
| 6        | F1              | 0         | 0.005     | 1         | 0.5       | 0         | 300        | 0.5       | NA       | NA       |
| 7        | F2              | 0         | 0.005     | NA        | NA        | 0         | NA         | NA        | 0.01     | 9        |
| 8        | F1              | 0         | 0.005     | 1         | 300       | 0         | 15         | 0.5       | NA       | NA       |
| 9        | F1              | 0         | 0.005     | 1         | 180       | 0         | 15         | 0.5       | NA       | NA       |
| 10       | F1              | 0         | 0.005     | 1         | 125       | 0         | 15         | 125       | NA       | NA       |

**Supplemental Table S3: Parameters used to define the input functions S1-10 in the virtual screen.** Parameter names correspond to equations 6-7 in Methods (F1 and F2, respectively). Parameters marked as NA do not apply to that particular function.

|                           |               | Response                                                                                                            |                                                                                                                                                                                                |                                                                                                                                      |
|---------------------------|---------------|---------------------------------------------------------------------------------------------------------------------|------------------------------------------------------------------------------------------------------------------------------------------------------------------------------------------------|--------------------------------------------------------------------------------------------------------------------------------------|
|                           |               | Out-of-Equilibrium                                                                                                  | Quasi-equilibrium                                                                                                                                                                              | Steady-State                                                                                                                         |
| Perturbations that affect | Time-scale    | <b>Affected</b> if the change in the balance of internal and stimulus-related time scales is substantial.           | <b>Typically affected</b> with simple perturbations because of their collateral effects on dose responses. Change in the kinetics may delay them but otherwise leave the amplitude unaffected. | <b>Not affected</b>                                                                                                                  |
|                           | Dose-response | <b>Not affected</b> unless the areas of the dose response curves that bound the response are changed significantly. | <b>Typically affected.</b>                                                                                                                                                                     | <b>Typically affected</b> unless the change in the shape of the curve does not alter the equilibrium level of the signaling species. |

**Supplemental Table S4: Principles governing dynamic effects of simple perturbations (relate to Figure 3).** How a simple perturbation affects out-of-equilibrium, quasi-equilibrium dynamics, or steady state depends on whether the primarily effect is on time-scales or dose-response surfaces. Complex perturbations (involving multiple reactions) allow for more selective control

See attached spreadsheet file.

**Supplemental Table S5. Reactions and Rate Constants for the NF $\kappa$ B model (relate to Figure 5 and 6).** The 73 reactions that make up the system are listed, with addition details. Two RNA synthesis reactions (69,70) also have a hill coefficient of 3, to represent transcriptional nonlinearity (cooperative binding). The parameter ID number correspond to the diagram in Figure S5 and Table S7.

| Min | TNFC  | TNFP  | LPS  | LPS-TNF |
|-----|-------|-------|------|---------|
| 0   | 1     | 1     | 1    | 1       |
| 5   | 59.38 | 59.38 | 1.5  | 3       |
| 10  | 100   | 100   | 2    | 4       |
| 15  | 64.57 | 64.57 | 2.5  | 5       |
| 20  | 50.15 | 50.15 | 3    | 5       |
| 25  | 35.73 | 35.73 | 3.5  | 5       |
| 30  | 30    | 21.3  | 4    | 5       |
| 35  | 30    | 19.66 | 4.5  | 5       |
| 40  | 30    | 18.03 | 5    | 5       |
| 45  | 30    | 16.39 | 5.5  | 5       |
| 50  | 30    | 14.16 | 6    | 4.33    |
| 55  | 30    | 11.93 | 6.5  | 3.67    |
| 60  | 30    | 9.7   | 7    | 3.00    |
| 65  | 30    | 8.25  | 7.5  | 2.67    |
| 70  | 30    | 6.8   | 8    | 2.33    |
| 75  | 30    | 5.35  | 8.5  | 2.00    |
| 80  | 30    | 3.9   | 9    | 1.67    |
| 85  | 30    | 2.45  | 9.5  | 1.33    |
| 90  | 30    | 1     | 10   | 1       |
| 95  | 30    | 1     | 10.5 | 1       |
| 100 | 30    | 1     | 11   | 1       |
| 105 | 30    | 1     | 11.5 | 1       |
| 110 | 30    | 1     | 12   | 1       |
| 115 | 30    | 1     | 12.5 | 1       |
| 120 | 30    | 1     | 13   | 1       |
| 125 | 30    | 1     | 14   | 1       |
| 130 | 30    | 1     | 15   | 1       |
| 135 | 30    | 1     | 16   | 1       |
| 140 | 30    | 1     | 17   | 1       |
| 145 | 30    | 1     | 18   | 1       |
| 150 | 30    | 1     | 19   | 1       |
| 155 | 30    | 1     | 20   | 1       |
| 160 | 30    | 1     | 21   | 1       |
| 165 | 30    | 1     | 22   | 1       |
| 170 | 30    | 1     | 23   | 1       |
| 175 | 30    | 1     | 24   | 1       |
| 180 | 30    | 1     | 25   | 1       |

**Supplemental Table S6: IKK Profiles for the NF $\kappa$ B simulations (relate to Figures 5 and 6).** The figures shown are percentages, and represent the percent of total IKK which is phosphorylated and thus active. LPS-TNF was derived from measurements of IKK activity in TNF ko cells (Werner et al., 2005) and used for simulations in Figure 6.

| Parameter #      | Description                                         | Grouping |        |
|------------------|-----------------------------------------------------|----------|--------|
|                  |                                                     | biochem. | pharm. |
| 8,10,12,13,14,15 | Association I $\kappa$ B-NF $\kappa$ B              | b1       |        |
| 16,23,28         | Dissociation I $\kappa$ B $\alpha$ -NF $\kappa$ B   | b6       |        |
| 18,25,29         | Dissociation I $\kappa$ B $\beta$ -NF $\kappa$ B    | b7       |        |
| 20,27,30         | Dissociation I $\kappa$ B $\epsilon$ -NF $\kappa$ B | b8       |        |
| 7,9,11           | Association IKK-I $\kappa$ B                        | b26      |        |
| 17,22            | Dissociation IKK-I $\kappa$ B $\alpha$              | b29      |        |
| 19,24            | Dissociation IKK-I $\kappa$ B $\beta$               | b30      |        |
| 21,26            | Dissociation IKK-I $\kappa$ B $\epsilon$            | b31      |        |
| 1,3,5            | Association IKK-I $\kappa$ B+NF $\kappa$ B          | b27      |        |
| 2,4,6            | Association I $\kappa$ BNF $\kappa$ B+IKK           | b28      |        |
| 37               | Export NF $\kappa$ B                                | b14      |        |
| 44               | Import NF $\kappa$ B                                | b13      |        |
| 31,32,33         | Export I $\kappa$ B-NF $\kappa$ B                   | b11      |        |
| 38,39,40         | Import I $\kappa$ B-NF $\kappa$ B                   | b9       |        |
| 34,35,36         | Export I $\kappa$ B                                 | b12      |        |
| 41,42,43         | Import I $\kappa$ B                                 | b10      |        |
| 54,55,56         | Degradation I $\kappa$ B                            | b4       | MG132  |
| 46,48,50         | Degradation I $\kappa$ B-NF $\kappa$ B              | b2       | MG132  |
| 45,47,49         | Degradation IKK-I $\kappa$ B                        | b5       | MG132  |
| 51,52,53         | Degrad. IKK-NF $\kappa$ B-I $\kappa$ B              | b3       | MG132  |
| 63               | I $\kappa$ B Protein synthesis                      | b15      | CHX    |
| 64               |                                                     | b16      | CHX    |
| 65               |                                                     | b17      | CHX    |
| 66               | I $\kappa$ B RNA degradation                        | b23      |        |
| 67               |                                                     | b24      |        |
| 68               |                                                     | b25      |        |
| 71               | I $\kappa$ B RNA synthesis                          | b20      | TSA    |
| 72               |                                                     | b21      | TSA    |
| 73               |                                                     | b22      | TSA    |
| 69               | NF- $\kappa$ B responsive RNA synthesis             | b18      | PDTC   |
| 70               |                                                     | b19      | PDTC   |

**Supplemental Table S7: NF $\kappa$ B model: Biochemical & Pharmacological Grouping (relate to Figures 5 and 6).** Related biochemical parameters identified as biochemical groups b1-b31. Selected pharmacologic agents affect the indicated parameters, defining the pharmacologic groupings. The parameter number corresponds to the labels in Figure S5.
